# Supplementary figures and images for: A versatile strategy for gene trapping and trap conversion in emerging model organisms
Source: Oxford University Press journal article supplement (doi:10.1242/dev.066324), 2011-05-24

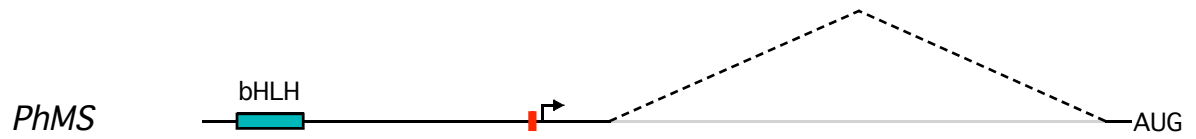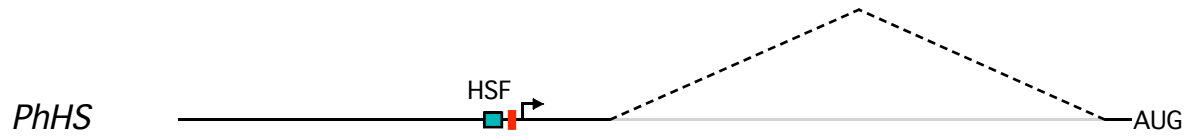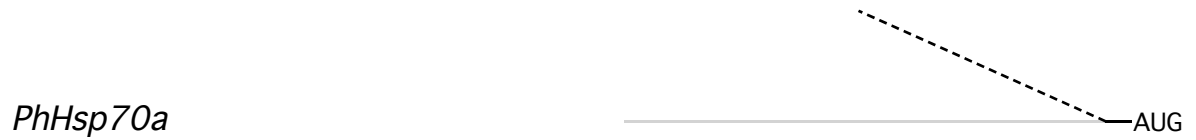

Supplement: dev066324figs1.pdf [file dev066324figs1.pdf]

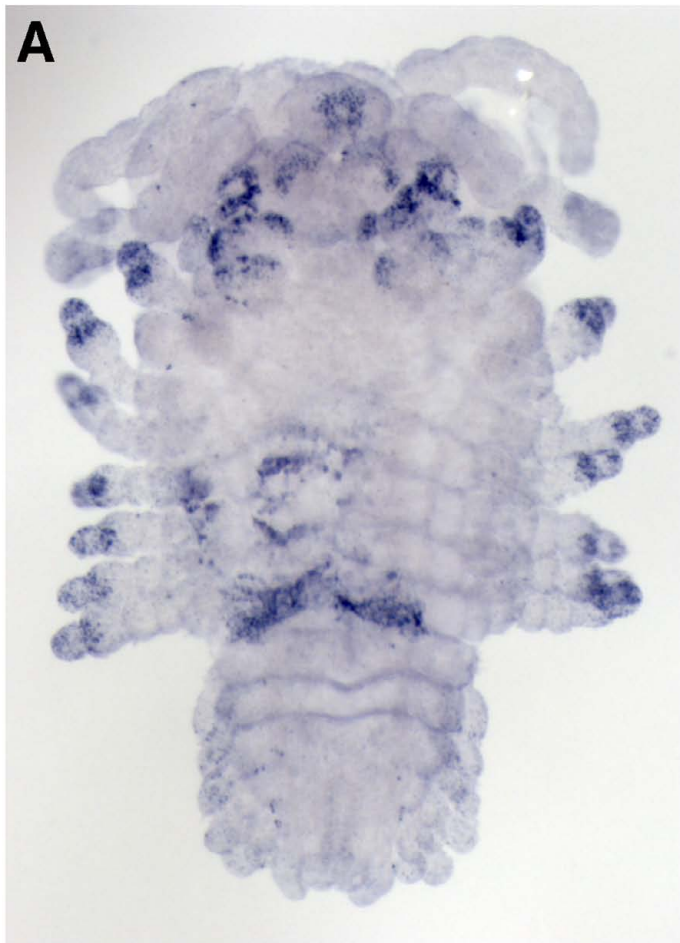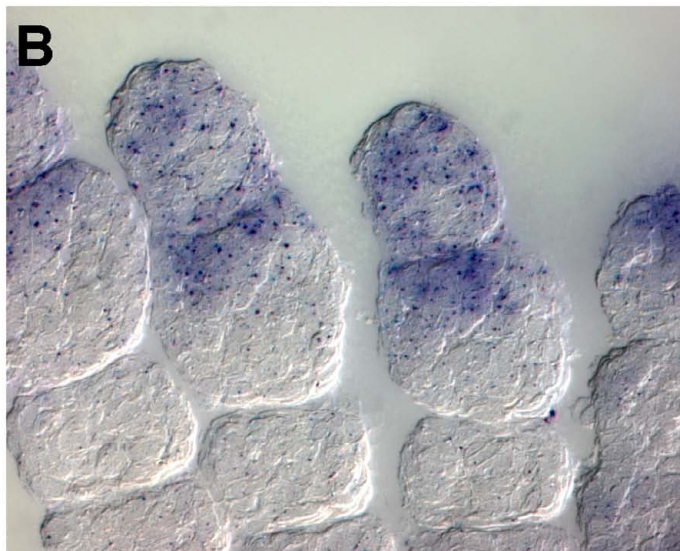

Supplement: dev066324figs2.pdf [file dev066324figs2.pdf]
